# Supplementary material for: Computational Characterization of β-Li3PS4 Solid Electrolyte: From Bulk and Surfaces to Nanocrystals
Source: MDPI journal article supplement (doi:10.3390/nano12162795), 2022-08-15
Supplement: s1 [file s1]

Supplementary Materials

# Computational Characterization of $\beta$ -Li<sub>3</sub>PS<sub>4</sub> Solid Electrolyte: From Bulk and Surfaces to Nanocrystals

Naiara Leticia Marana <sup>1,\*</sup>, Mauro Francesco Sgroi <sup>2</sup>, Lorenzo Maschio <sup>1</sup>, Anna Maria Ferrari <sup>1</sup>, Maddalena D'Amore <sup>1</sup> and Silvia Casassa <sup>1,\*</sup>

<sup>1</sup> Theoretical Group of Chemistry, Chemistry Department, Torino University, 10124 Torino, Italy

<sup>2</sup> Centro Ricerche Fiat S.C.p.A., Strada Torino 50, 10043 Orbassano, Italy

\* Correspondence: naiaraleticia.marana@unito.it (N.L.M.); silvia.casassa@unito.it (S.C.)

## Topic S1: Bulk data

**Table S1:** Cell parameters and band gap of  $\beta$ -Li<sub>3</sub>PS<sub>4</sub>

| $\beta$ -Li <sub>3</sub> PS <sub>4</sub> (Pnma) | <i>a</i> (Å) | <i>b</i> (Å) | <i>c</i> (Å) | E <sub>gap</sub> (eV) |
|-------------------------------------------------|--------------|--------------|--------------|-----------------------|
| Experimental <sup>1</sup>                       | 12.82        | 8.22         | 6.12         | 5.0                   |
| Theoretical <sup>2</sup>                        | 12.86        | 7.76         | 6.21         | 2.2 – 3.7             |
| PBE                                             | 13.03        | 8.13         | 6.29         | 2.70                  |
| PBE0                                            | 12.96        | 8.08         | 6.25         | 4.71                  |
| HSE06                                           | 12.96        | 8.09         | 6.25         | 3.97                  |

**Table S2:** Mechanical properties of  $\beta$ -Li<sub>3</sub>PS<sub>4</sub>

|                           | Bulk modulus | Young's modulus | Poisson ratio | C <sub>11</sub> | C <sub>12</sub> | C <sub>13</sub> | C <sub>22</sub> | C <sub>23</sub> | C <sub>33</sub> | C <sub>44</sub> | C <sub>55</sub> | C <sub>66</sub> |
|---------------------------|--------------|-----------------|---------------|-----------------|-----------------|-----------------|-----------------|-----------------|-----------------|-----------------|-----------------|-----------------|
| Theoretical. <sup>3</sup> | 21.39        | 28.90           | 0.27          | 47.82           | 15.93           | 17.90           | 36.23           | 10.20           | 28.46           | 12.88           | 9.81            | 12.17           |
| <i>Pnma</i>               | 21.82        | 32.35           | 0.26          | 53.33           | 16.46           | 18.24           | 38.38           | 10.48           | 31.31           | 13.72           | 11.66           | 13.64           |
| <i>Pn2<sub>1</sub>a</i>   | 24.31        | 33.58           | 0.27          | 51.57           | 18.94           | 18.66           | 36.52           | 13.63           | 37.96           | 15.69           | 11.71           | 14.24           |

## Topic S2: $\beta$ -Li<sub>3</sub>PS<sub>4</sub> surfaces

**Table S3:** Possible termination along +z of each analyzed surface. The “X” represents the termination found in the surface and the ‘-’ the termination not found

|       | LiS <sub>3</sub> | PS <sub>3</sub> | PS <sub>2</sub> | SLi <sub>2</sub> | S | Li | SPLi <sub>2</sub> | LiS <sub>2</sub> | SPLi | LiS |
|-------|------------------|-----------------|-----------------|------------------|---|----|-------------------|------------------|------|-----|
| (100) | -                | X               | -               | X                | - | X  | -                 | X                | -    | -   |
| (001) | X                | X               | -               | -                | - | -  | X                 | X                | -    | X   |
| (010) | -                | X               | -               | -                | - | X  | -                 | X                | -    | -   |
| (101) | -                | X               | -               | X                | X | -  | X                 | X                | -    | -   |
| (011) | -                | X               | X               | -                | - | -  | X                 | X                | X    | X   |
| (110) | X                | -               | X               | X                | - | -  | -                 | X                | -    | X   |
| (111) | X                | X               | X               | X                | - | -  | -                 | -                | X    | X   |
| (210) | -                | X               | X               | -                | - | -  | -                 | X                | X    | -   |
| (211) | X                | -               | X               | X                | - | -  | X                 | X                | -    | -   |

### Topic S3: Discussion on the choice of surface terminations

- (001)

In order to maintain the 4 units in the surface as in the bulk, the analyzed surfaces (001) contain 22 layers each. According to our analysis, only 2 terminations were judged to be possible candidates for the study. The surfaces are shown below. As the termination  $\text{LiS}_2/\text{LiS}_2$  (not symmetric) presented the minor  $E_{surf}$ , it was calculated with 8 units of  $\text{Li}_3\text{PS}_4$ .

(a)  $E_{surf} = 5.15 \text{ J/m}^2$

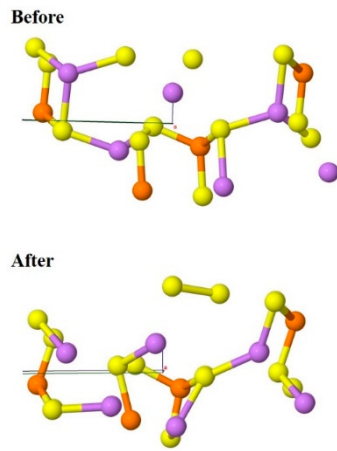

(b)  $E_{surf} = 1.89 \text{ J/m}^2$

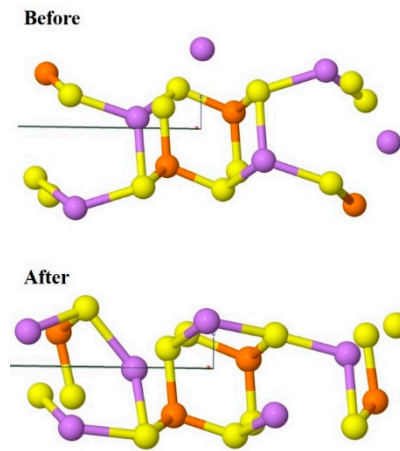

**Figure S1:** (a)  $\text{SLi}_2/\text{SP}$  and (b)  $\text{LiS}_2/\text{LiS}_2$

- (100)

For this surface, also 22 layers correspond to 4 units of  $\text{Li}_3\text{PS}_4$ . Four terminations were analyzed (see below), as the termination denominated  $\text{LiS}_2/\text{LiS}_2$  presented the minor  $E_{surf}$ , the surface with 8 units was calculated and the  $E_{surf}$  obtained is  $0.91 \text{ J/m}^2$ , i. e.,  $0.90 \text{ J/m}^2$  minor than the surface with 4 units.

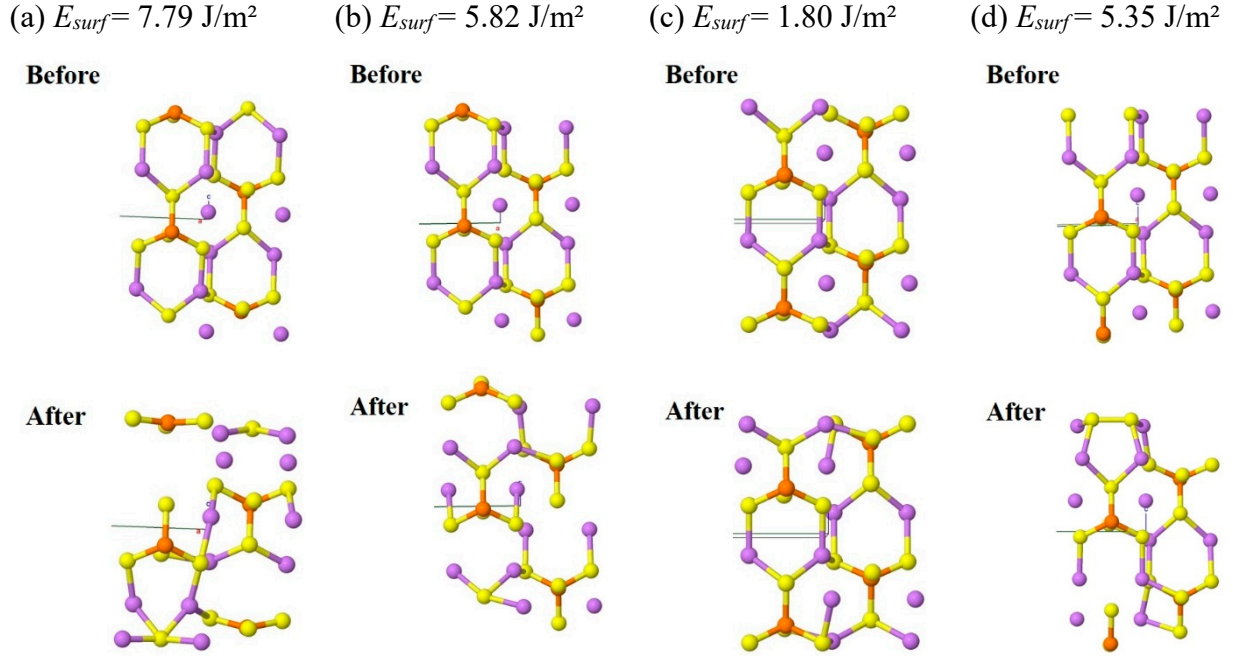

**Figure S2:** (a) SLi<sub>2</sub>/SLi, (b) PS<sub>3</sub>/SP, (c) LiS<sub>2</sub>/LiS<sub>2</sub>, and (d) LiS/PS

- **(010)**

Eight layers of this surface have 4 units of Li<sub>3</sub>PS<sub>4</sub>. This surface has only two possible terminations: LiS<sub>2</sub>/Li and PS<sub>3</sub>/SLi<sub>2</sub> (see below). The surface with termination LiS<sub>2</sub>/Li presented the minor  $E_{surf}$  and it was calculated with 8 units of Li<sub>3</sub>PS<sub>4</sub>. After optimization, the  $E_{surf}$  of (010) with 8 units is 1.83 J/m<sup>2</sup> and decreases 1.20 J/m<sup>2</sup> from the  $E_{surf}$  of (010) with 4 units.

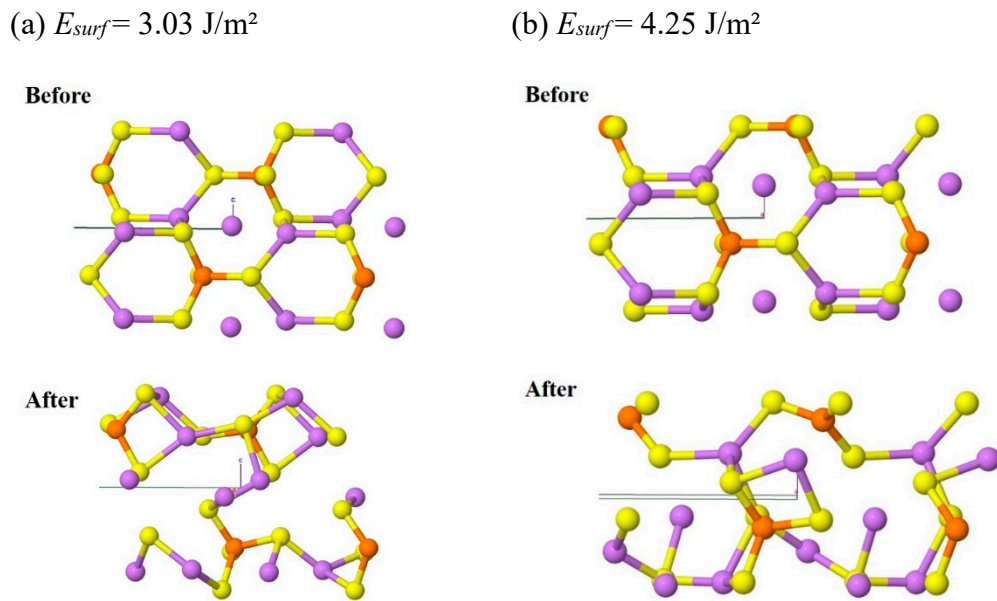

**Figure S3:** (a) LiS<sub>2</sub>/Li and (b) PS<sub>3</sub>/SLi<sub>2</sub>

- (101)

The surface (101) was made with 21 layers to respect the 4 units of  $\text{Li}_3\text{PS}_4$ . Only the 4 terminations below were considered relevant. However, only the termination called LiS/LiS maintains the cluster  $[\text{PS}_4]$  integer, that is the surface with minor  $E_{\text{surf}}$ , 1.54 J/m<sup>2</sup> and it was calculated with 8 units of  $\text{Li}_3\text{PS}_4$  which  $E_{\text{surf}}$  obtained was 8.20 J/m<sup>2</sup>. Therefore, this termination's surface showed to be unstable.

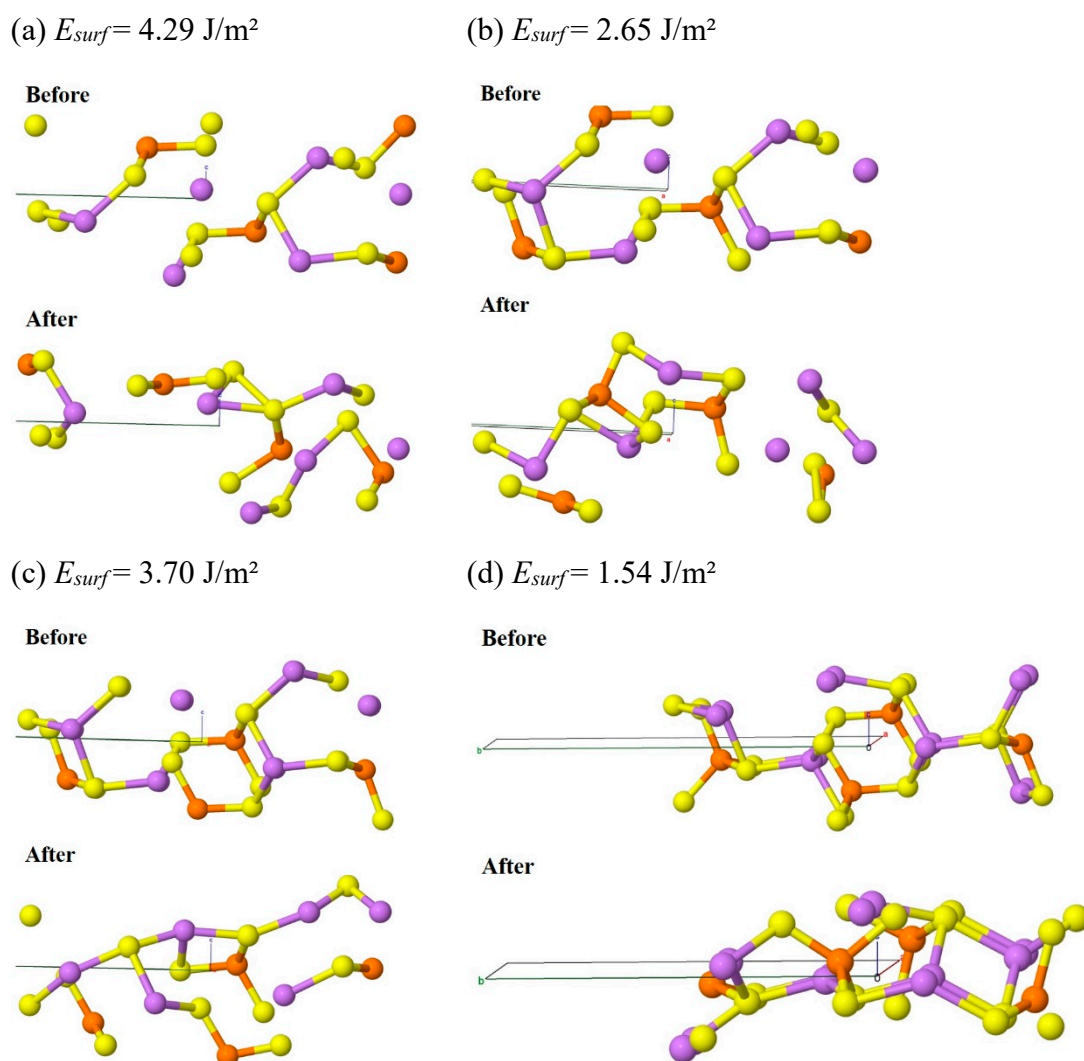

**Figure S4:** (a)  $\text{PS}_3/\text{LiS}$ , (b)  $\text{PS}_3/\text{SPLi}$ , (c)  $\text{LiS}_2/\text{PS}_2$ , and (d)  $\text{LiS}/\text{LiS}$

- **(011)**

The 4 units of  $\text{Li}_3\text{PS}_4$  are given by 16 layers of the (011) surface. Two terminations were considered relevant due to the many unbonded atoms in the other terminations (see below). The termination  $\text{PS}_3/\text{Li}$  presented the minor  $E_{surf}$  and it was calculated with 8 units of  $\text{Li}_3\text{PS}_4$ , which  $E_{surf}$  obtained was  $1.50 \text{ J/m}^2$ , i. e., no changes in the surface energy formation were observed by the increasing number of units.

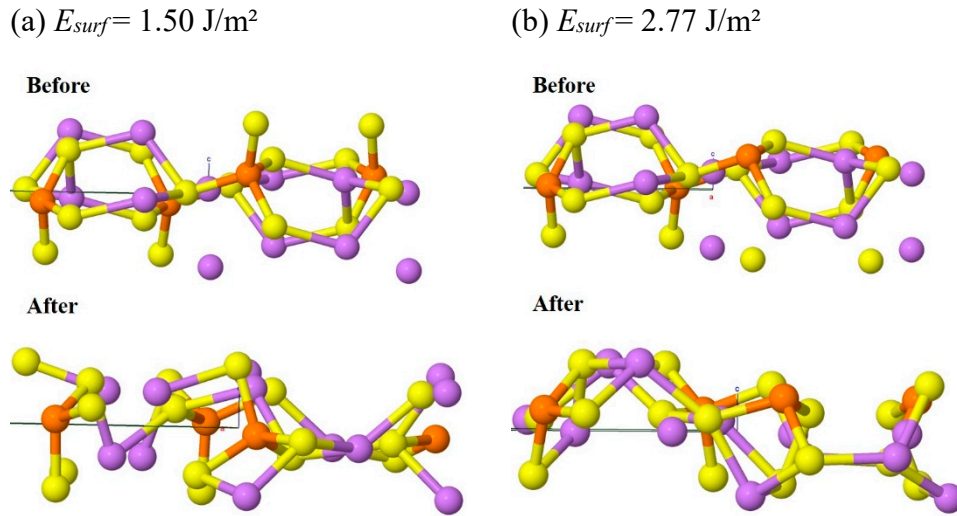

**Figure S5:** (a)  $\text{PS}_3/\text{Li}$  and (b)  $\text{LiS}_2/\text{Li}$

- **(110)**

The (110) surface was initially studied with 4 units of  $\text{Li}_3\text{PS}_4$ , which is composed of 30 layers. Only 3 terminations were considered interesting for this study (see below). As the termination  $\text{SLi}_2/\text{Li}$  presented the minor  $E_{surf}$ , was calculated the surface with 8 units of  $\text{Li}_3\text{PS}_4$ , also, the termination  $\text{LiS}/\text{LiS}$  (considered symmetric) was calculated with 8 units. Both terminations with 8 units have, almost, the same  $E_{surf}$ ,  $2.24$  and  $2.27 \text{ J/m}^2$  for  $\text{LiS}/\text{LiS}$  and  $\text{SLi}_2/\text{Li}$ , respectively, a reduction of 40% and 30% concerning the 4 units models. However, the termination  $\text{SLi}_2/\text{Li}$  presented the smallest structural distortion after the optimization and kept the tetrahedron  $[\text{PS}_4]$ .

(a)  $E_{surf} = 3.22 \text{ J/m}^2$

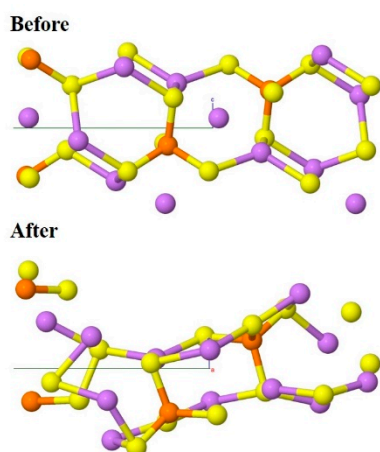

(b)  $E_{surf} = 4.78 \text{ J/m}^2$

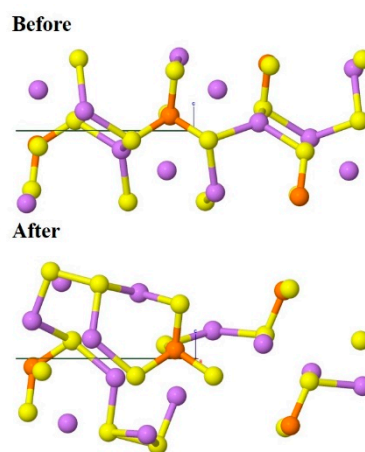

(c)  $E_{surf} = 3.67 \text{ J/m}^2$

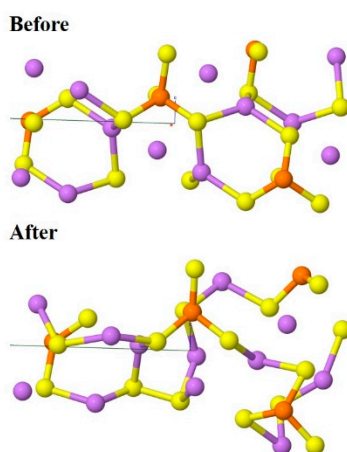

**Figure S6:** (a)  $\text{SLi}_2/\text{Li}$ , (b)  $\text{LiS}/\text{LiS}$ , and (c)  $\text{PS}_2/\text{SPLi}$

- (111)

The surface (111) needs 30 layers to have 4 units of  $\text{Li}_3\text{PS}_4$ . No symmetric terminations were found for this surface. The terminations analyzed were  $\text{LiS}_3/\text{LiS}$ ,  $\text{PS}_2/\text{LiS}_2$ ,  $\text{SLi}_2/\text{LiS}_2$ , and  $\text{Li}/\text{PS}_3$  (see below). The termination  $\text{LiS}_3/\text{LiS}$  presented the minor  $E_{\text{surf}}$  and it was calculated taking to account 8 units of  $\text{Li}_3\text{PS}_4$ . After full optimization, the  $E_{\text{surf}}$  is 1.60  $\text{J}/\text{m}^2$ , i. e., a reduction of  $\sim 40\%$ .

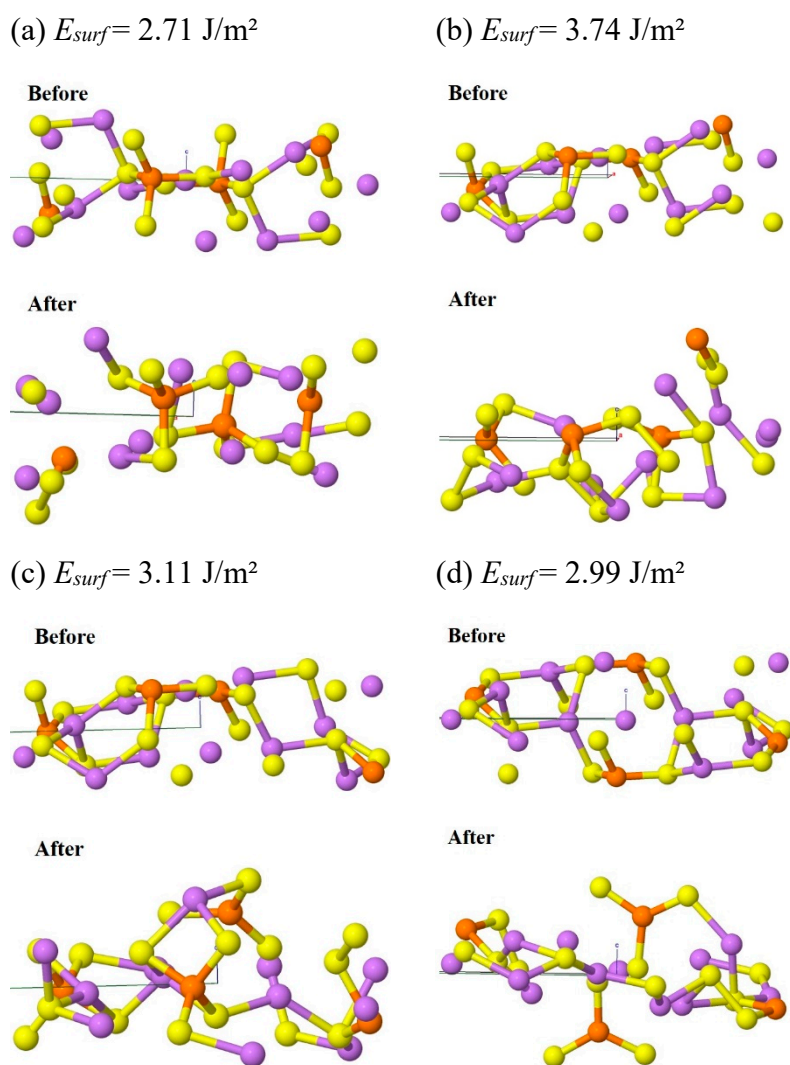

**Figure S7:** (a)  $\text{LiS}_3/\text{LiS}$ , (b)  $\text{PS}_2/\text{LiS}_2$ , (c)  $\text{SLi}_2/\text{LiS}_2$ , and (d)  $\text{Li}/\text{PS}_3$



- **(210)**

The surface (210) with 16 layers is composed of 4 units of  $\text{Li}_3\text{PS}_4$ . It was seen that only 4 terminations are relevant for the present study (see below). The termination  $\text{SPLi/Li}$  presented the minor  $E_{\text{surf}}$  and it was optimized with 8 units. After optimization, it was found an  $E_{\text{surf}} = 0.99 \text{ J/m}^2$ , a reduction of 41%.

(a)  $E_{\text{surf}} = 1.70 \text{ J/m}^2$

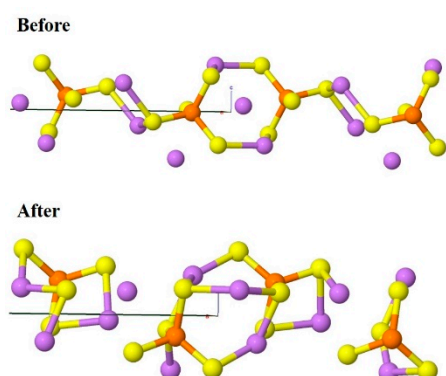

(b)  $E_{\text{surf}} = 3.18 \text{ J/m}^2$

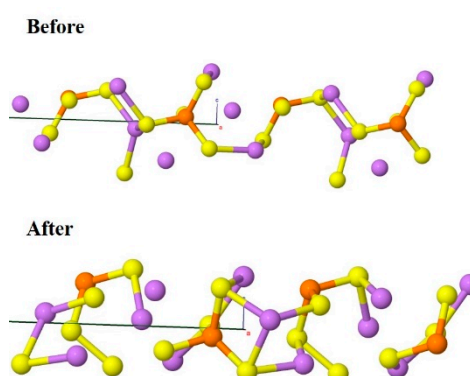

(c)  $E_{\text{surf}} = 3.06 \text{ J/m}^2$

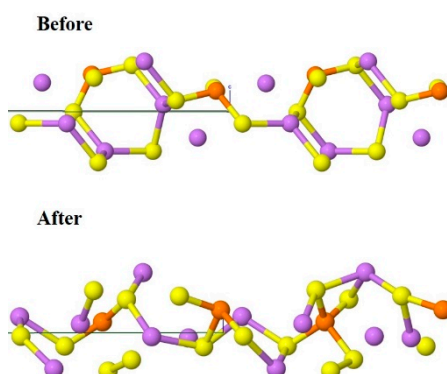

**Figure S8:** (a)  $\text{SPLi/Li}$ , (b)  $\text{LiS}_2/\text{LiS}$ , and (c)  $\text{LiS}_2/\text{SLi}_2$

- **(211)**

The (211) surface was analyzed with 30 layers (4 units of  $\text{Li}_3\text{PS}_4$ ). No symmetric terminations were found. The 3 relevant terminations are represented below. It was found that the termination  $\text{LiS}_2/\text{SPLi}$  presents the minor  $E_{\text{surf}}$ , and a model with 8 units was also calculated. The  $E_{\text{surf}}$  of 8 units is reduced  $\sim 51\%$ ,  $1.57 \text{ J/m}^2$ .

(a)  $E_{\text{surf}} = 3.62 \text{ J/m}^2$

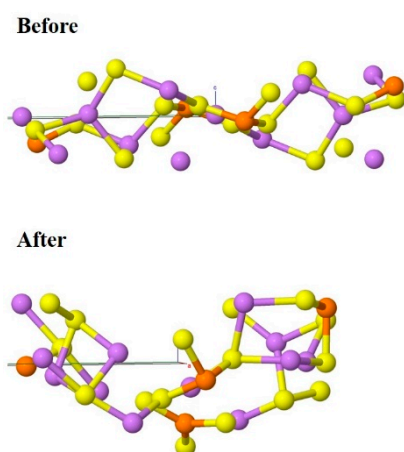

(b)  $E_{\text{surf}} = 3.04 \text{ J/m}^2$

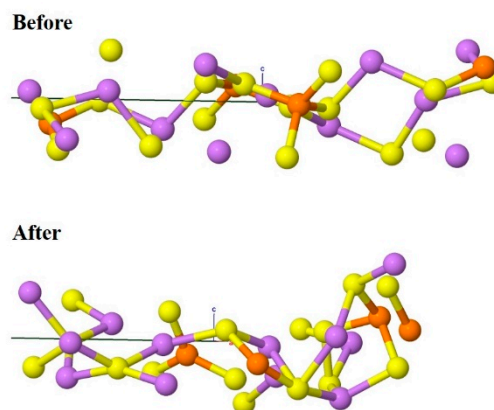

(c)  $E_{\text{surf}} = 4.27 \text{ J/m}^2$

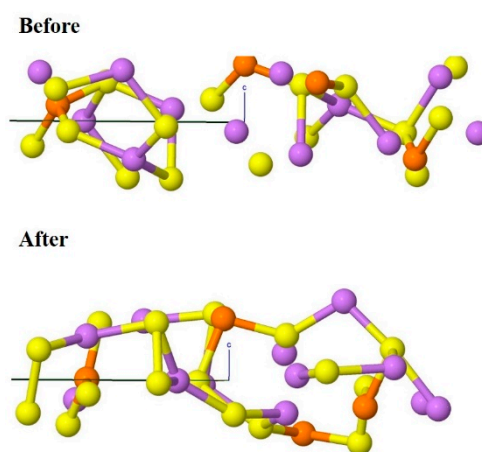

**Figure S9:** (a)  $\text{SLi}_2/\text{LiS}$ , (b)  $\text{LiS}_2/\text{SPLi}$ , and (c)  $\text{PS}_2/\text{LiS}$

**Table S4:** Hirshfield charges of  $\beta$ -Li<sub>3</sub>PS<sub>4</sub> bulk and 8-unit surfaces for the surface (indicated by \*) and internal atoms.

|              | Li <sub>1</sub> | Li* <sub>1</sub> | Li <sub>2</sub> | Li* <sub>2</sub> | P            | P*           | S <sub>1</sub> | S* <sub>1</sub> | S <sub>2</sub> | S* <sub>2</sub> | S <sub>3</sub> | S* <sub>3</sub> |
|--------------|-----------------|------------------|-----------------|------------------|--------------|--------------|----------------|-----------------|----------------|-----------------|----------------|-----------------|
| <b>bulk</b>  | <b>1.007</b>    | <b>1.007</b>     | <b>1.011</b>    | <b>1.011</b>     | <b>1.573</b> | <b>1.573</b> | <b>-1.147</b>  | <b>-1.147</b>   | <b>-1.272</b>  | <b>-1.272</b>   | <b>-1.034</b>  | <b>-1.034</b>   |
| <b>(001)</b> | 1.006           | 1.004            | 1.008           | 0.993            | 1.580        | 1.127        | -1.150         | -1.023          | -1.249         | -1.206          | -1.059         | -1.176          |
| <b>(100)</b> | 1.007           | 1.003            | 1.010           | 1.008            | 1.575        | 1.498        | -1.149         | -1.130          | -1.268         | -1.297          | -1.033         | -1.020          |
| <b>(010)</b> | 1.006           | 0.979            | 1.008           | 1.011            | 1.611        | 1.500        | -1.174         | -0.945          | -1.239         | -1.253          | -1.033         | -1.035          |
| <b>(011)</b> | 1.009           | 1.001            | 1.013           | 1.012            | 1.566        | 1.588        | -1.226         | -0.974          | -1.261         | -1.022          | -1.183         | -0.836          |
| <b>(110)</b> | 1.009           | 1.001            | 1.009           | 1.008            | 1.410        | 1.024        | -1.161         | -0.706          | -1.273         | -1.154          | -1.187         | -0.799          |
| <b>(111)</b> | 1.005           | 0.959            | 1.009           | 1.009            | 1.657        | 0.605        | -1.158         | -0.948          | -1.304         | -1.192          | -1.078         | -0.973          |
| <b>(210)</b> | 1.009           | 0.972            | 1.011           | 1.002            | 1.565        | 1.549        | -1.177         | -1.006          | -1.246         | -1.180          | -1.107         | -1.001          |
| <b>(211)</b> | 1.007           | 1.002            | 1.016           | 1.013            | 1.508        | 0.569        | -1.130         | -0.971          | -1.229         | -2.004          | -1.098         | -0.530          |

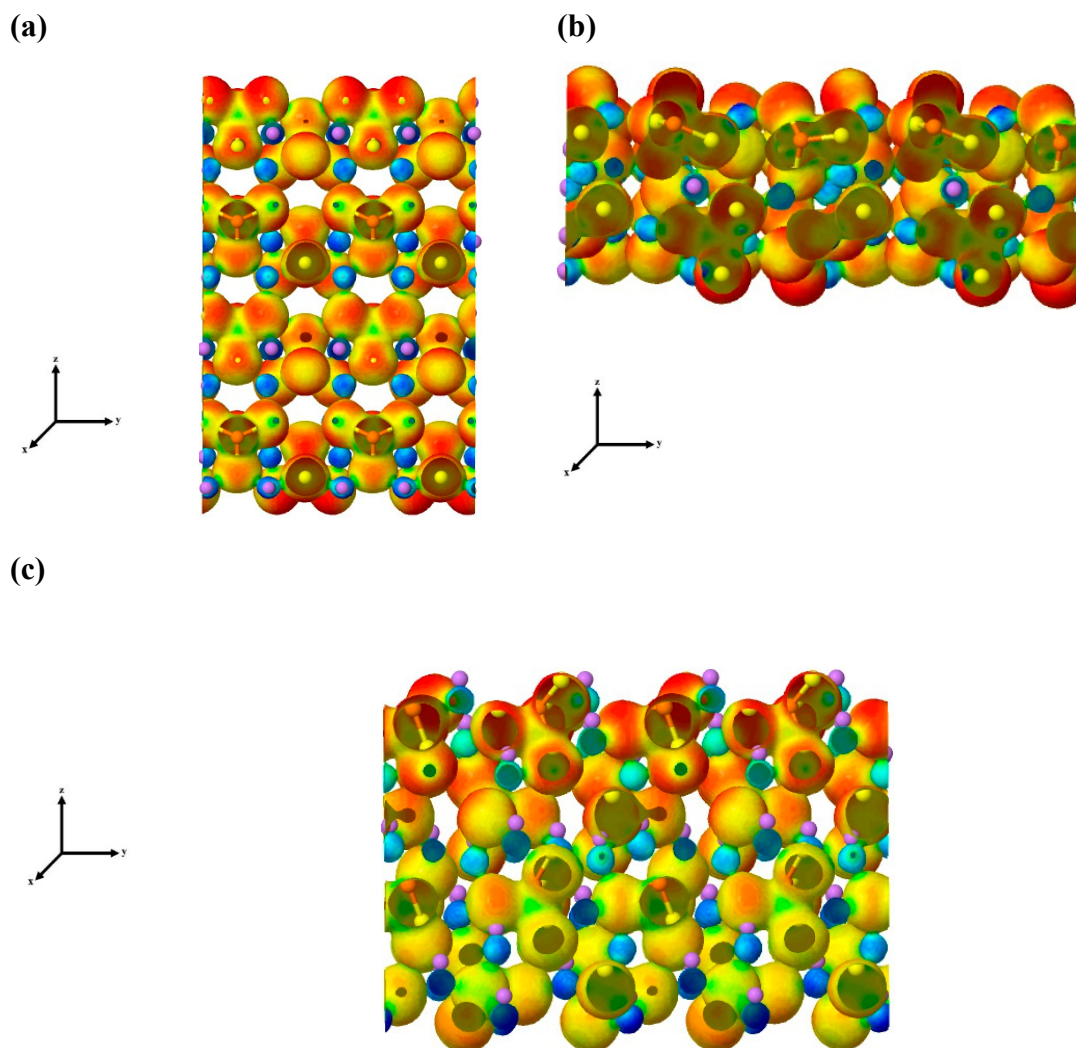

**Figure S10:** Three-dimensional maps of the electronic charge density superimposed to the electrostatic potential of  $\beta$ -Li<sub>3</sub>PS<sub>4</sub> surfaces along z-direction: (a) (100), (b) (210), and (c) (011). The spheres in purple, orange, yellow, and black are related to the lithium, phosphor, and sulfur atoms. The scale maps range from negative (-) in blue to positive (+) in red.

#### References

1. Homma, K. *et al.* Crystal structure and phase transitions of the lithium ionic conductor Li<sub>3</sub>PS<sub>4</sub>. *Solid State Ionics* **182**, 53–58 (2011).
2. Lepley, N. D., Holzwarth, N. A. W. & Du, Y. A. Structures, Li<sup>+</sup> Mobilities, and Interfacial Properties of Solid Electrolytes Li<sub>3</sub>PS<sub>4</sub> and Li<sub>3</sub>PO<sub>4</sub> from First Principles. *Phys. Rev. B* **88**, 104103 (2013).
3. Yang, Y. *et al.* Elastic Properties, Defect Thermodynamics, Electrochemical Window, Phase Stability, and Li<sup>+</sup> Mobility of Li<sub>3</sub>PS<sub>4</sub>: Insights from First-Principles Calculations. *ACS Appl. Mater. Interfaces* **8**, 25229–25242 (2016).
